# Supplementary material
Source: publisher site journal article supplement (https://www.dovepress.com/article/330194)
Supplement: Supplementary file 1 [file get_supplementary_file.php]

Table S1. Length of Stay, medications at discharge and patient compliance in male and female subjects

| Characteristic | Whole Groupe (n=644) | Men (n=431) | Women (n=213) |
| --- | --- | --- | --- |
| **Length of Stay, days** | 5 ± 0.4 | 5 ± 0.3 | 5 ± 0.5 |
| **Medications at discharge** |  |  |  |
| Aspirin, % | 622 (96.6) | 415 (96.3) | 207 (97.2) |
| Clopidogrel/Ticagrelor, % | 486 (75.5) | 329 (76.3) | 157 (73.7) |
| β-blocker, % | 492 (76.4) | 331 (76.8) | 161 (75.6) |
| ACEI/ARB, % | 466 (72.3) | 311 (72.1) | 155 (72.7) |
| Statin, % | 616 (95.7) | 411 (95.4) | 205 (96.2) |
| **Patient compliance, %** | 622 (98.3) | 414 (96.1) | 208 (97.7) |
